# Supplementary material for: Housing Stability and Neurocognitive Functioning in Homeless Adults With Mental Illness: A Subgroup Analysis of the At Home/Chez Soi Study
Source: PubMed Central journal article supplement (PMC6889850; doi:10.3389/fpsyt.2019.00865), 2019-11-26
Supplement: Table_1.pdf [file Table_1.pdf]

Supplemental Table I. Adjusted means for changes in cognitive domain scores between 6 and 24 months

|                                          | Overall neuropsychological functioning z-score |       |       | Verbal learning and memory domain z-score <sup>1</sup> |       |       | Complex processing speed and cognitive flexibility domain z-score <sup>§</sup> |       |       |
|------------------------------------------|------------------------------------------------|-------|-------|--------------------------------------------------------|-------|-------|--------------------------------------------------------------------------------|-------|-------|
|                                          | mean                                           | SD    | p*    | mean                                                   | SD    | p*    | mean                                                                           | SD    | p*    |
| <b>Stable Housing (% days)</b>           |                                                |       | 0.542 |                                                        |       | 0.139 |                                                                                |       | 0.329 |
| <25%                                     | 0.028                                          | 0.511 |       | 0.005                                                  | 0.837 |       | 0.044                                                                          | 0.570 |       |
| 25-50%                                   | 0.027                                          | 0.522 |       | 0.156                                                  | 0.716 |       | -0.060                                                                         | 0.604 |       |
| >50%                                     | -0.013                                         | 0.513 |       | -0.026                                                 | 0.847 |       | -0.004                                                                         | 0.557 |       |
| <b>Lifetime homelessness (≥ 3 years)</b> |                                                |       | 0.189 |                                                        |       | 0.612 |                                                                                |       | 0.136 |
| No                                       | -0.023                                         | 0.494 |       | -0.014                                                 | 0.813 |       | -0.028                                                                         | 0.544 |       |
| Yes                                      | 0.022                                          | 0.532 |       | 0.014                                                  | 0.853 |       | 0.028                                                                          | 0.584 |       |
| <b>Age at 6-month testing</b>            |                                                |       | 0.267 |                                                        |       | 0.529 |                                                                                |       | 0.114 |
| <25                                      | 0.020                                          | 0.505 |       | -0.132                                                 | 0.926 |       | 0.120                                                                          | 0.584 |       |
| 25-29                                    | 0.007                                          | 0.588 |       | -0.012                                                 | 0.879 |       | 0.019                                                                          | 0.695 |       |
| 30-34                                    | 0.032                                          | 0.550 |       | 0.105                                                  | 0.958 |       | -0.016                                                                         | 0.578 |       |
| 35-39                                    | 0.043                                          | 0.532 |       | 0.058                                                  | 0.895 |       | 0.032                                                                          | 0.537 |       |
| 40-44                                    | 0.045                                          | 0.475 |       | 0.051                                                  | 0.819 |       | 0.040                                                                          | 0.545 |       |
| 45-49                                    | 0.014                                          | 0.477 |       | -0.002                                                 | 0.755 |       | 0.025                                                                          | 0.501 |       |
| 50-54                                    | -0.097                                         | 0.514 |       | -0.081                                                 | 0.778 |       | -0.108                                                                         | 0.578 |       |
| ≥55                                      | -0.069                                         | 0.491 |       | -0.044                                                 | 0.695 |       | -0.086                                                                         | 0.548 |       |
| <b>Gender</b>                            |                                                |       | 0.627 |                                                        |       | 0.341 |                                                                                |       | 0.841 |
| Male                                     | -0.006                                         | 0.514 |       | -0.018                                                 | 0.835 |       | 0.003                                                                          | 0.573 |       |
| Female                                   | 0.012                                          | 0.513 |       | 0.038                                                  | 0.829 |       | -0.005                                                                         | 0.549 |       |
| <b>Education (≥HS)</b>                   |                                                |       | 0.130 |                                                        |       | 0.045 |                                                                                |       | 0.744 |
| No                                       | 0.025                                          | 0.504 |       | 0.054                                                  | 0.858 |       | 0.006                                                                          | 0.554 |       |
| Yes                                      | -0.026                                         | 0.522 |       | -0.057                                                 | 0.803 |       | -0.006                                                                         | 0.578 |       |
| <b>First language</b>                    |                                                |       | 0.908 |                                                        |       | 0.692 |                                                                                |       | 0.831 |
| English/French                           | 0.001                                          | 0.512 |       | 0.005                                                  | 0.845 |       | -0.002                                                                         | 0.563 |       |
| Other                                    | -0.004                                         | 0.520 |       | -0.023                                                 | 0.779 |       | 0.008                                                                          | 0.574 |       |

|                                   |        |       |                  |        |       |                  |        |       |
|-----------------------------------|--------|-------|------------------|--------|-------|------------------|--------|-------|
| <b>Race</b>                       |        |       | <b>&lt;0.001</b> |        |       | <b>&lt;0.001</b> |        | 0.855 |
| Aboriginal                        | 0.140  | 0.550 |                  | 0.323  | 0.945 |                  | 0.018  | 0.545 |
| Black                             | -0.103 | 0.528 |                  | -0.199 | 0.706 |                  | -0.039 | 0.721 |
| Other                             | -0.008 | 0.441 |                  | -0.031 | 0.695 |                  | 0.007  | 0.540 |
| White                             | -0.030 | 0.503 |                  | -0.075 | 0.816 |                  | 0.000  | 0.535 |
| <b>Site</b>                       |        |       | <b>&lt;0.001</b> |        |       | <b>&lt;0.001</b> |        | 0.695 |
| Moncton                           | -0.026 | 0.478 |                  | -0.010 | 0.809 |                  | -0.037 | 0.545 |
| Montreal                          | -0.007 | 0.463 |                  | -0.037 | 0.749 |                  | 0.013  | 0.510 |
| Winnipeg                          | 0.129  | 0.554 |                  | 0.288  | 0.900 |                  | 0.023  | 0.570 |
| Toronto                           | -0.105 | 0.520 |                  | -0.227 | 0.795 |                  | -0.025 | 0.629 |
| <b>Needs level</b>                |        |       | 0.523            |        |       | 0.641            |        | 0.612 |
| Moderate                          | -0.007 | 0.515 |                  | -0.009 | 0.840 |                  | -0.006 | 0.561 |
| High                              | 0.016  | 0.510 |                  | 0.019  | 0.818 |                  | 0.014  | 0.576 |
| <b>Alcohol abuse</b>              |        |       | 0.066            |        |       | 0.275            |        | 0.087 |
| No                                | -0.030 | 0.478 |                  | -0.029 | 0.718 |                  | -0.031 | 0.559 |
| Yes                               | 0.033  | 0.547 |                  | 0.031  | 0.941 |                  | 0.033  | 0.570 |
| <b>Substance abuse</b>            |        |       | 0.664            |        |       | 0.468            |        | 0.956 |
| No                                | -0.008 | 0.529 |                  | -0.021 | 0.784 |                  | 0.001  | 0.591 |
| Yes                               | 0.007  | 0.499 |                  | 0.019  | 0.876 |                  | -0.001 | 0.540 |
| <b>Psychosis</b>                  |        |       | 0.913            |        |       | 0.814            |        | 0.948 |
| No                                | -0.002 | 0.525 |                  | -0.006 | 0.885 |                  | 0.001  | 0.555 |
| Yes                               | 0.002  | 0.498 |                  | 0.007  | 0.760 |                  | -0.001 | 0.578 |
| <b>Major depressive disorder</b>  |        |       | 0.655            |        |       | 0.571            |        | 0.910 |
| No                                | -0.008 | 0.480 |                  | -0.017 | 0.758 |                  | -0.002 | 0.571 |
| Yes                               | 0.007  | 0.539 |                  | 0.014  | 0.890 |                  | 0.002  | 0.561 |
| <b>PTSD</b>                       |        |       | <b>0.002</b>     |        |       | <b>0.001</b>     |        | 0.163 |
| No                                | -0.033 | 0.499 |                  | -0.058 | 0.810 |                  | -0.017 | 0.554 |
| Yes                               | 0.082  | 0.539 |                  | 0.143  | 0.872 |                  | 0.041  | 0.590 |
| <b>Bipolar affective disorder</b> |        |       | 0.155            |        |       | <b>0.005</b>     |        | 0.553 |
| No                                | -0.009 | 0.502 |                  | -0.028 | 0.803 |                  | 0.004  | 0.566 |
| Yes                               | 0.068  | 0.592 |                  | 0.217  | 1.018 |                  | -0.031 | 0.563 |

PTSD, Post-Traumatic Stress Disorder; SD, Standard Deviation

<sup>¶</sup> Average of HVLТ-R Total recall and HVLТ-R delayed recall

<sup>§</sup> Average of WAIS-R Digit symbol, Trail A and Trail B

\* ANOVA/T-Test comparing change in Z-scores between 6 and 24 months
